# Supplementary material for: Live virus neutralizing antibodies against pre and post Omicron strains in food and retail workers in Québec, Canada
Source: bioRxiv or medRxiv preprint supplement (doi:10.1101/2023.09.03.23294976), 2023-09-03

**A**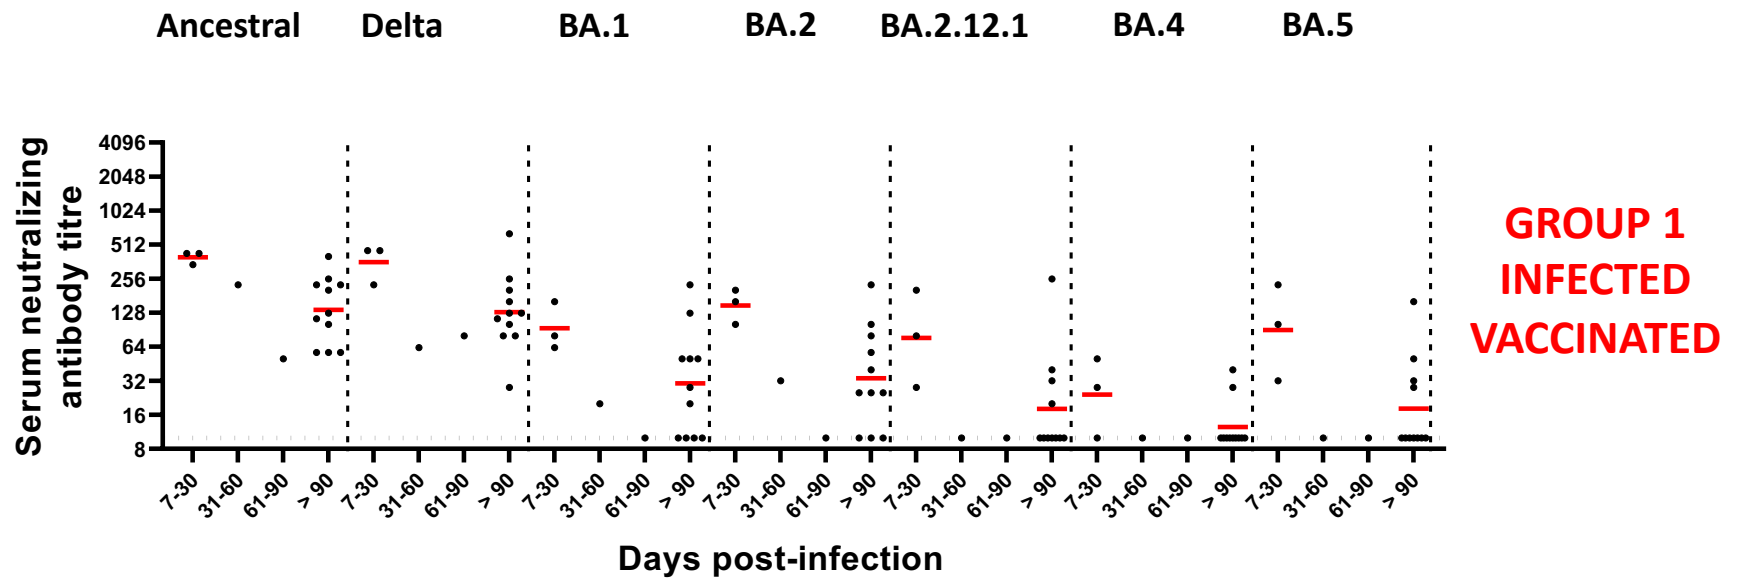**B**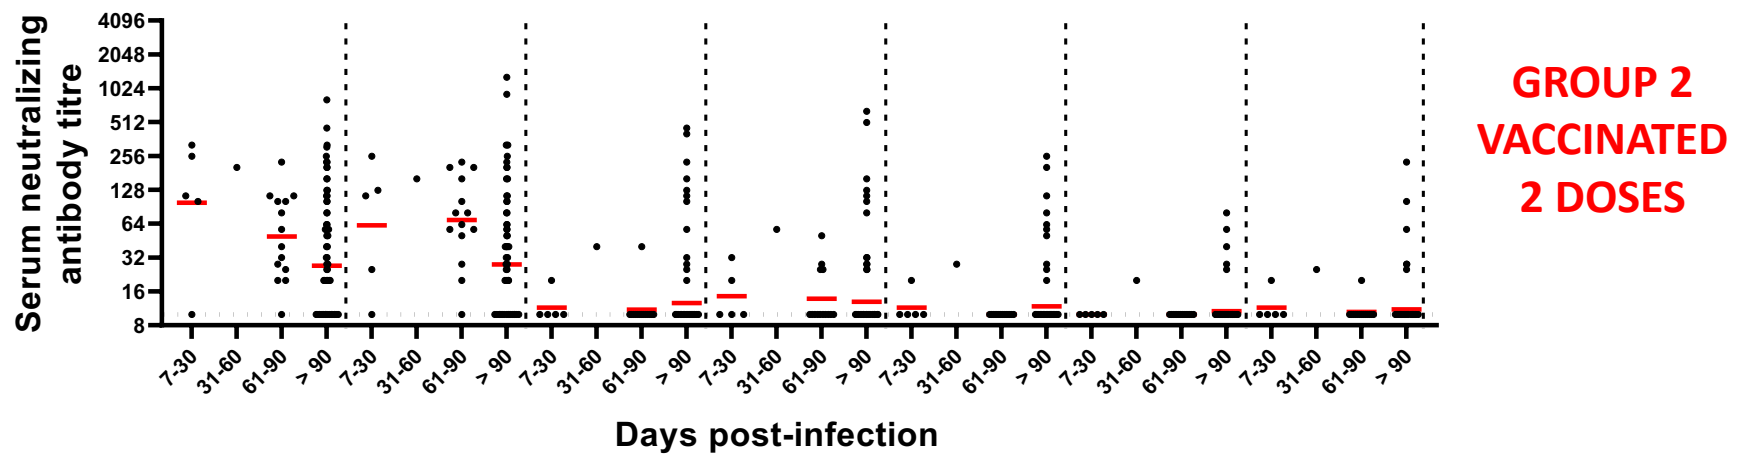

**C**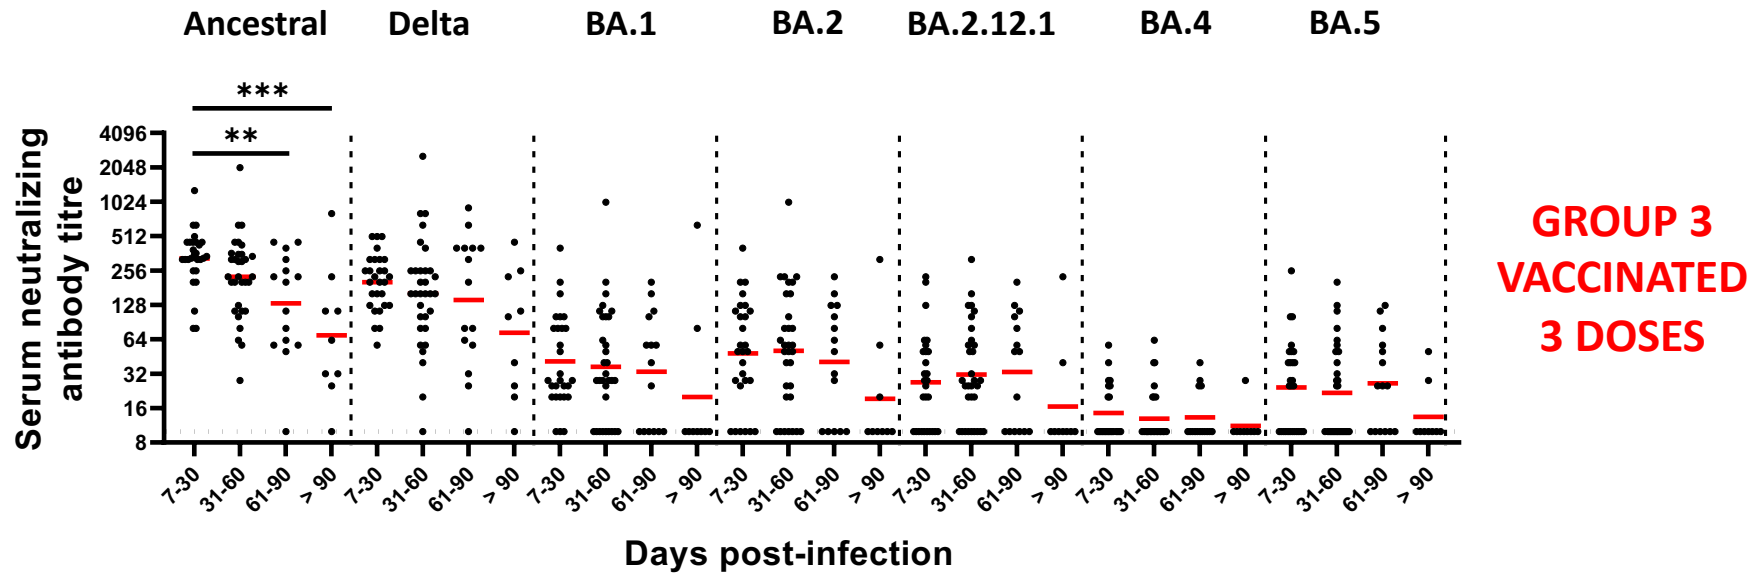**D**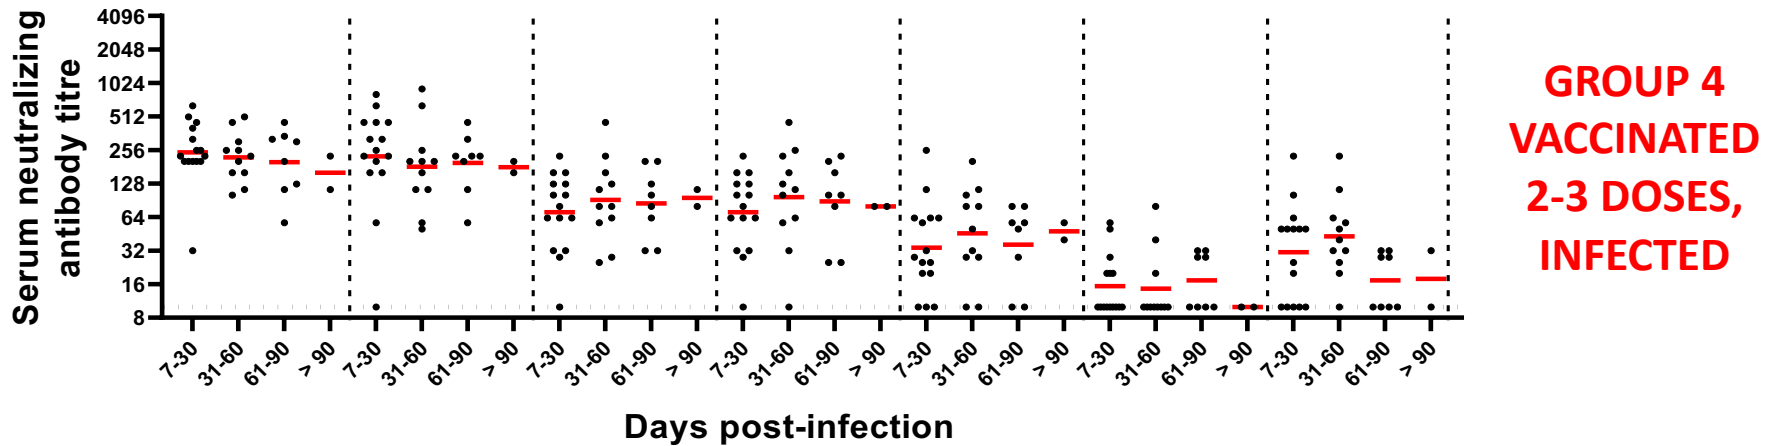

### Grocery (n=105)

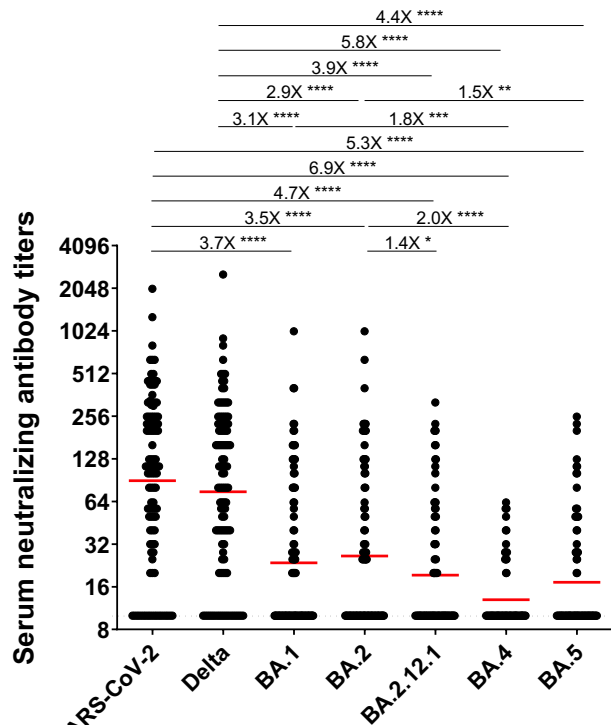

### Restaurant/Bar (n=133)

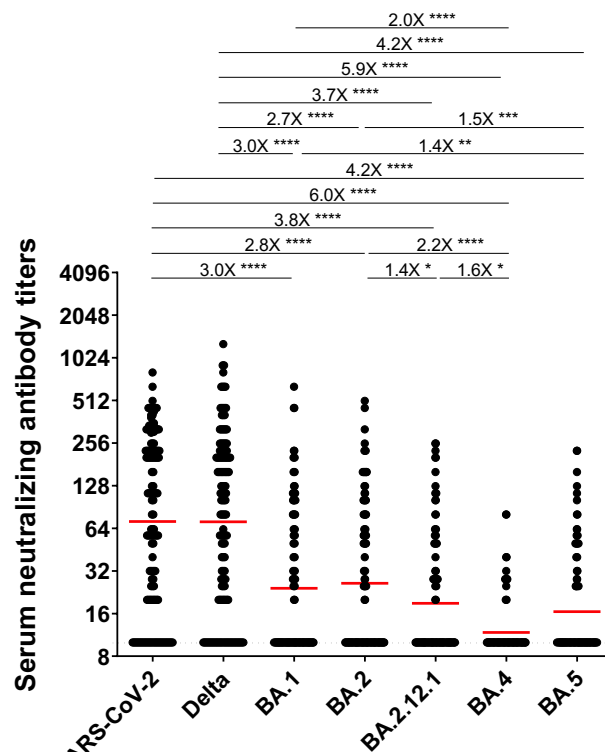

### Hardware (n=42)

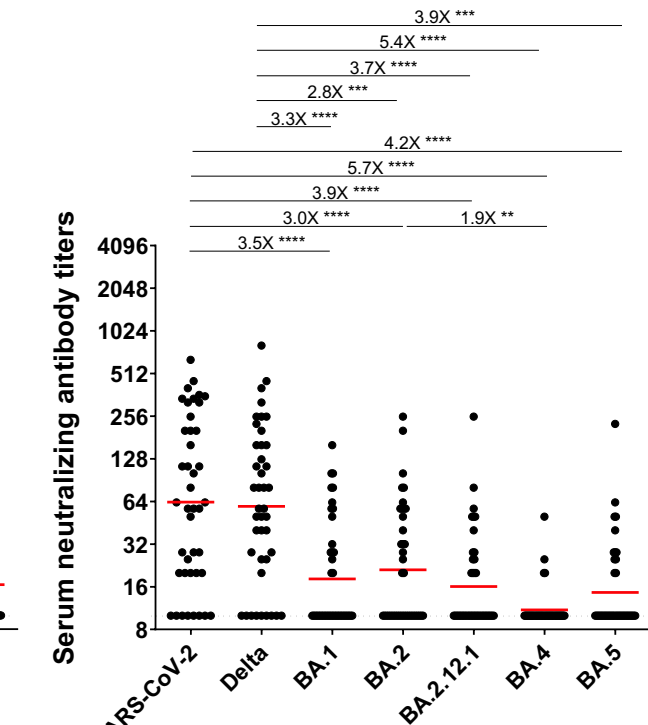

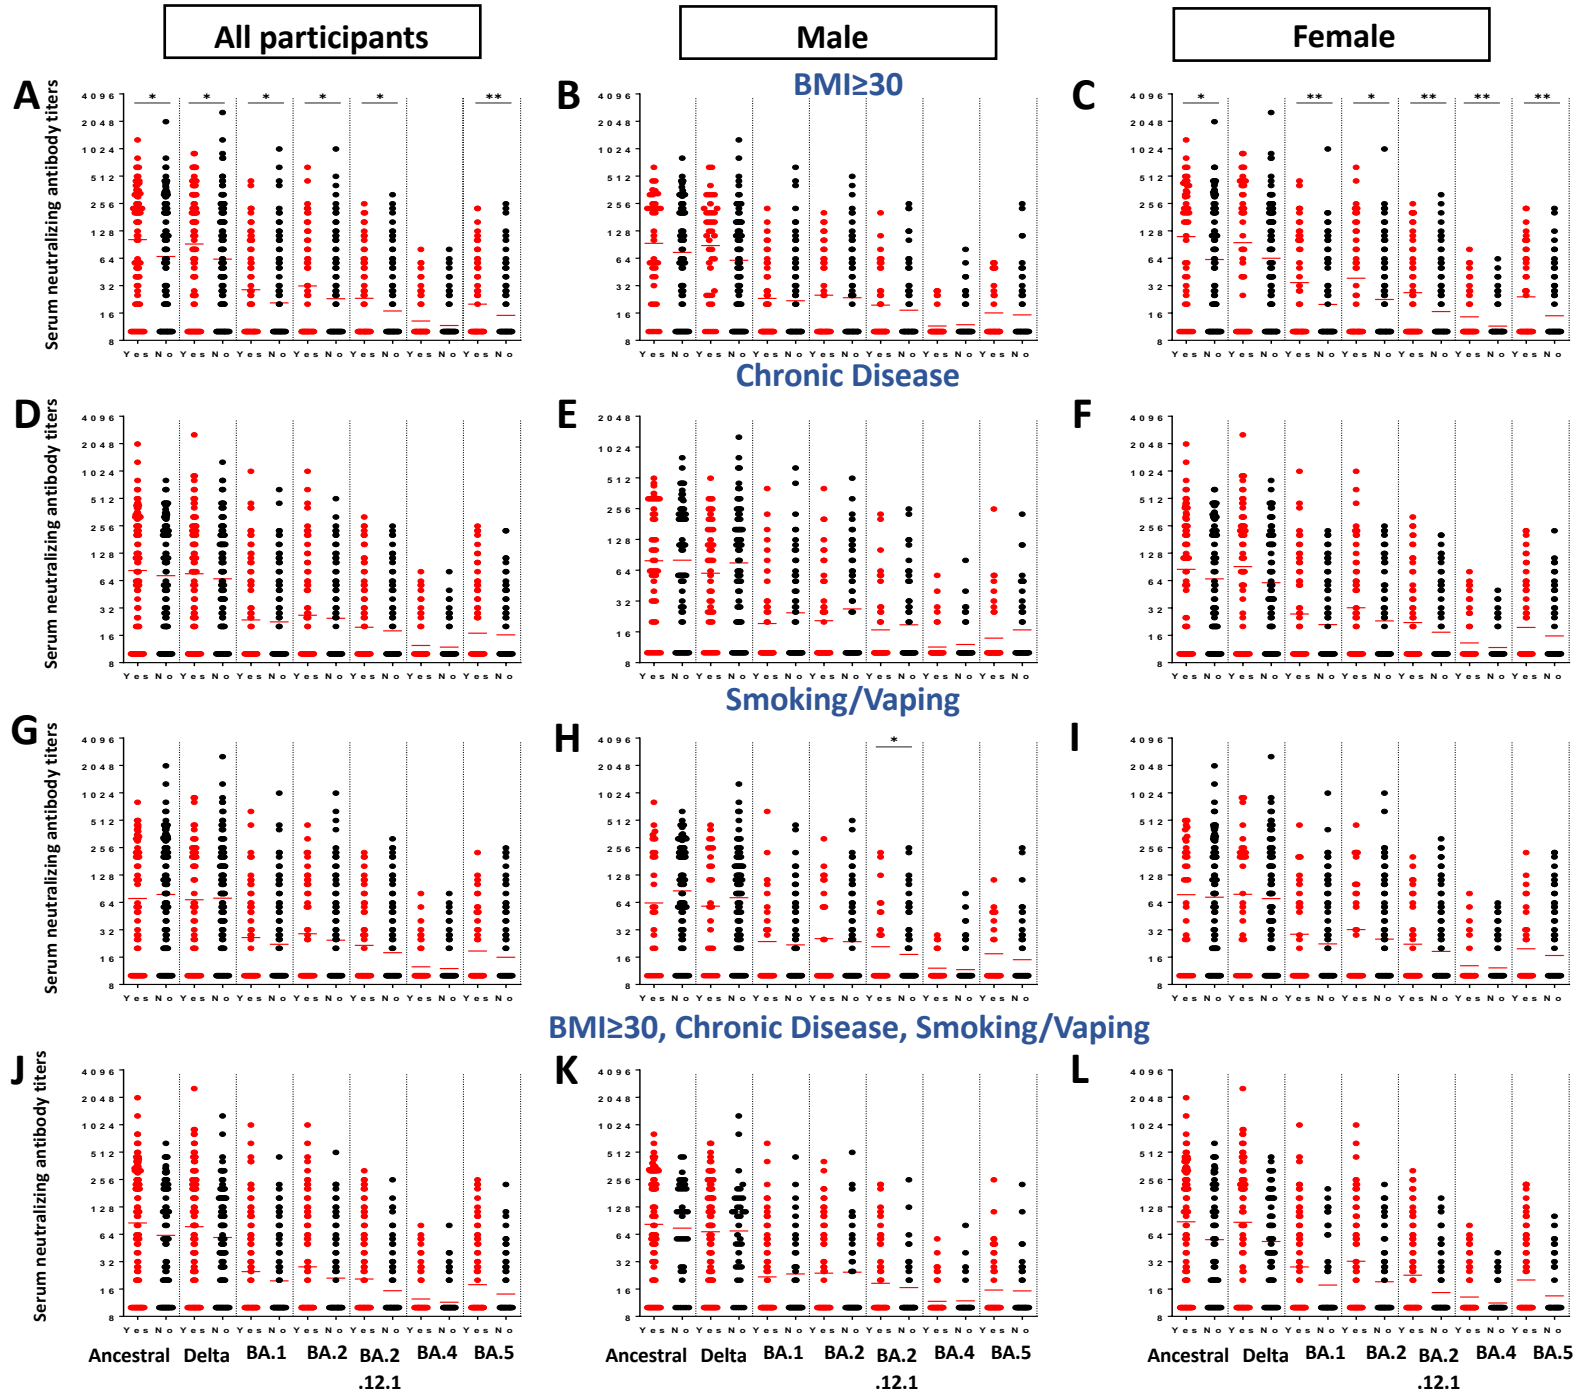

Supplement: Supplementary file [file media-1.pdf]
